# Supplementary material for: Facet-engineered TiO2 nanomaterials reveal the role of water–oxide interactions in surface protonic conduction
Source: Royal Society of Chemistry journal article supplement (doi:10.1039/d1ta06075a), 2021-12-09
Supplement: d1ta06075a1.pdf [file d1ta06075a1.pdf]

## Supporting Information (SI)

### Facet-engineered TiO<sub>2</sub> nanomaterials reveal the role of water-oxide interactions in surface protonic conduction

Xiaolan Kang, Athanasios Chatzitakis, Thomas Aarholt, Xinwei Sun, Chiara Negri, Truls Norby\*

Centre for Materials Science and Nanotechnology (SMN), University of Oslo, NO-0318 Oslo, Norway

\*corresponding author: [truls.norby@kjemi.uio.no](mailto:truls.norby@kjemi.uio.no)

## List of figures

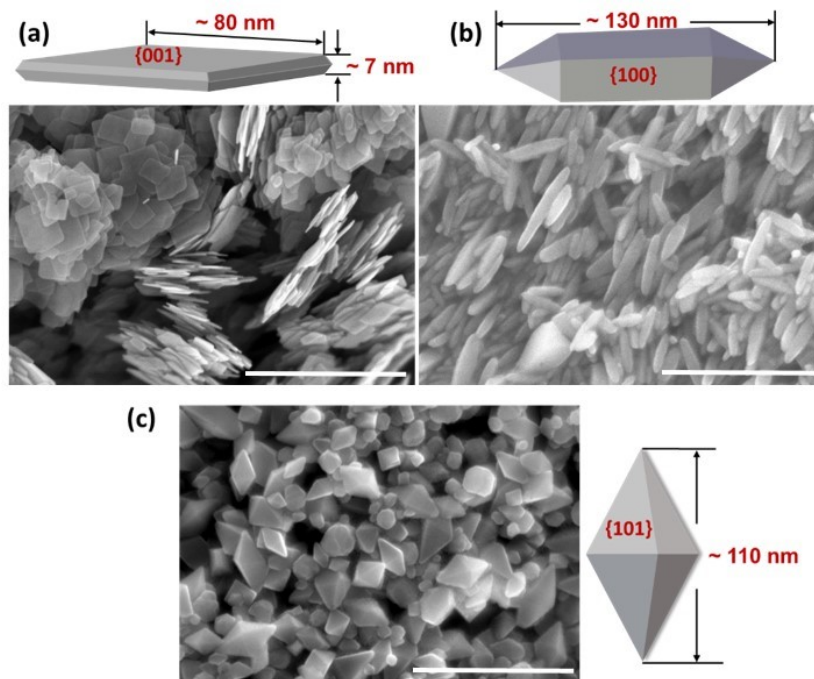

**Fig. S1:** SEM images and indicative particle dimensions of (a) T001, (b) T100 and (c) T101. Scale bar is 500 nm.

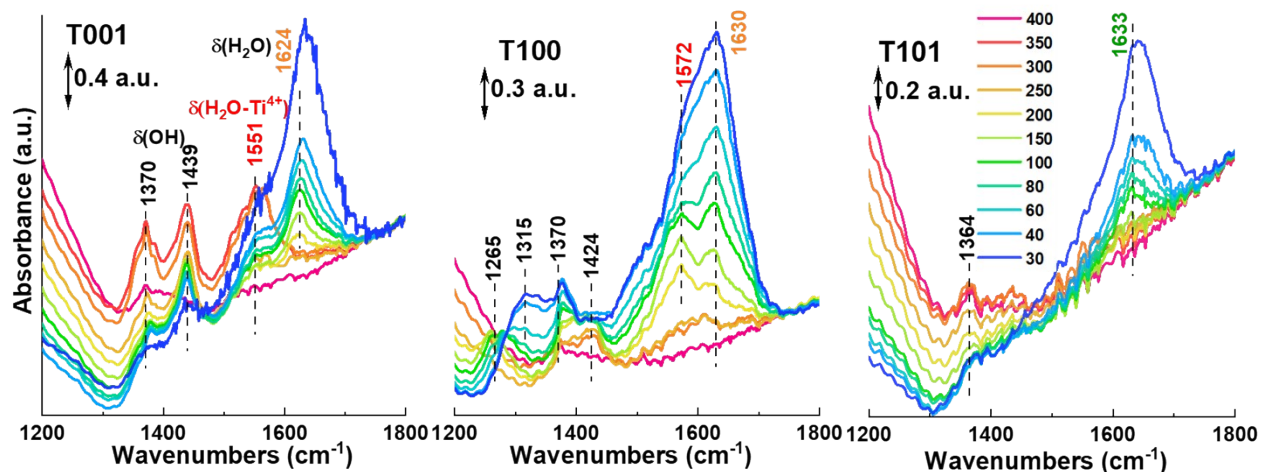

**Fig. S2:** FTIR spectra at low frequencies of TiO<sub>2</sub> samples for different temperatures (in °C) and progressive water vapor removal. The colors of the peak numbers correspond to the different temperatures.

Fig. S2 shows the FTIR spectra in the O-H bending region, two main peaks at around 1630 cm<sup>-1</sup> and 1365 cm<sup>-1</sup> are typical for the bending mode of physisorbed water molecules, δ(H<sub>2</sub>O), and the

hydroxyls,  $\delta(\text{OH})$ , respectively.<sup>1</sup> Using the  $1630\text{ cm}^{-1}$  peak as an indicator, it can be safely concluded that most of the molecularly adsorbed water is removed at temperatures above  $300\text{ }^\circ\text{C}$  for both T100 and T001 samples. In the case of T101 this happens at  $150\text{ }^\circ\text{C}$  due to the weak hydrogen bonds among water molecules. A strong shoulder in the  $1550\text{-}1600\text{ cm}^{-1}$  range of the T001 and T100 samples can be ascribed to the bending mode of  $\text{H}_2\text{O}$  molecules directly absorbed on the  $\text{Ti}^{4+}$  sites, which is still visible during the progressive outgassing process to  $350\text{ }^\circ\text{C}$ . In the  $\delta(\text{OH})$  vibration region, several new peaks ( $1265$  and  $1315\text{ cm}^{-1}$ ) are observed in the T100 sample at temperatures below  $100\text{ }^\circ\text{C}$ , which might be related to the isolated hydroxyl groups.

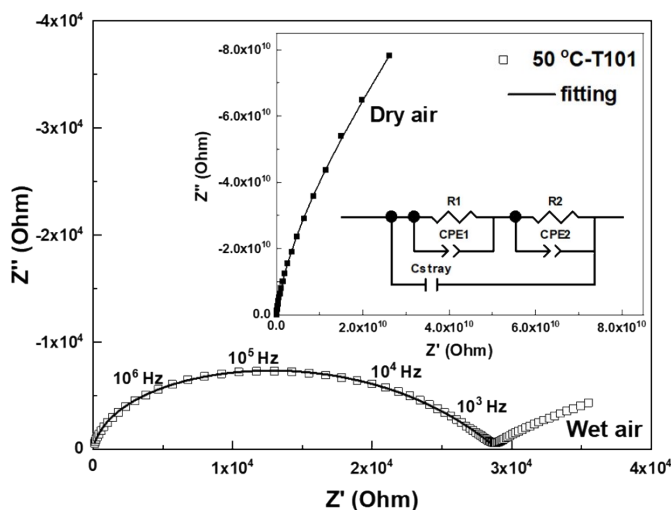

**Fig. S3:** Nyquist plots of the T101 sample recorded in wet ( $p_{\text{H}_2\text{O}} = 0.026\text{ atm}$ ) and dry conditions at  $50\text{ }^\circ\text{C}$ , the inset shows also the equivalent circuit describing the proton transport and associated capacitances.

Fig. S3 shows Nyquist plots of impedance spectra for the T101 sample in wet and dry atmospheres at  $50\text{ }^\circ\text{C}$ . The response under wet conditions shows an arc at low frequencies attributed to the electrode impedance, and one arc at high frequencies with capacitances in the pF/cm range and attributed to surface protonic transport in the  $\text{TiO}_2$ . Many studies of surface protonics report two time constants in this range, suggested to reflect intra- and inter-grain surface protonic resistances<sup>2</sup>. In our results, this differentiation is not clear, and we only report the conductivity interpreted from a single arc. The result for dry conditions shows a partial arc of a much higher impedance, and no electrode impedance is visible.

## List of tables

Table S1: Surface area and pore structure properties of TiO<sub>2</sub> samples

| TiO <sub>2</sub> | BET surface area<br>(m <sup>2</sup> /g) | Pore volume<br>(cm <sup>3</sup> /g) | Mean pore diameter (nm) |
|------------------|-----------------------------------------|-------------------------------------|-------------------------|
| T001             | 66.3                                    | 0.48                                | 29.2                    |
| T100             | 50.5                                    | 0.56                                | 44.2                    |
| T101             | 57.8                                    | 0.37                                | 25.4                    |

Table S2: Pre-exponentials and activation energies of total conductivities for porous TiO<sub>2</sub> samples with predominance of different surface facets, fitted with TableCurve2D to  $\log(\sigma T)$  vs  $1/T$  plots. Data marked “H<sub>2</sub>O”, “D<sub>2</sub>O”, and “0.5H<sub>2</sub>O” have  $p_{\text{H}_2\text{O}} = 0.026$  bar,  $p_{\text{D}_2\text{O}} = 0.023$  bar, and  $p_{\text{H}_2\text{O}} = 0.013$  bar, respectively. “Dry” means bottle-dry with  $p_{\text{H}_2\text{O}}$  estimated at  $3 \cdot 10^{-5}$  bar (30 ppm). Data for T100 and T001 in wet atmospheres were fitted to a model of the sum of bulk conductivity and surface protonic conductivity in chemisorbed and 1<sup>st</sup> solid physisorbed water layers. For T101, an additional intermediate surface protonic contribution is included. In “H<sub>2</sub>O” and “D<sub>2</sub>O” data an additional contribution from liquid-like physisorbed water was evident for the lowest temperature, which was therefore omitted in the fitting. In “0.5H<sub>2</sub>O” data, this was not visible, and the lowest temperature point was included in the fitting. In dry atmospheres, only the bulk conductivity was fitted, and the lowest temperature points were omitted, to exclude surface protonic contribution. Parameters are given with standard deviations, in some cases with more digits than statistically appropriate, in order to have a consistent number of decimals and allow reproduction of the measured data.

|      |                     | Bulk                         |             | Chemisorbed                  |            | Intermediate                 |            | 1 <sup>st</sup> (solid) physisorbed |              |
|------|---------------------|------------------------------|-------------|------------------------------|------------|------------------------------|------------|-------------------------------------|--------------|
|      |                     | Log<br>( $\sigma_0$ (SK/cm)) | $E_a$ (eV)  | Log<br>( $\sigma_0$ (SK/cm)) | $E_a$ (eV) | Log<br>( $\sigma_0$ (SK/cm)) | $E_a$ (eV) | Log<br>( $\sigma_0$ (SK/cm))        | $E_a$ (eV)   |
| T100 | H <sub>2</sub> O    | 5.67±2.13                    | 1.30±0.29   | -0.80±0.57                   | 0.46±0.06  |                              |            | -14.55±0.15                         | -0.79±0.01   |
|      | D <sub>2</sub> O    | 5.59±1.82                    | 1.30±0.24   | -1.12±0.80                   | 0.47±0.08  |                              |            | -15.72±0.21                         | -0.86±0.02   |
|      | 0.5H <sub>2</sub> O | 4.14±1.45                    | 1.09±0.19   | -1.20±0.85                   | 0.46±0.08  |                              |            | -16.12±0.18                         | -0.84±0.01   |
|      | Dry                 | 3.94±0.16                    | 1.07±0.02   |                              |            |                              |            |                                     |              |
| T001 | H <sub>2</sub> O    | 5.84±0.27                    | 1.24±0.04   | -1.61±0.32                   | 0.40±0.03  |                              |            | -14.23±0.06                         | -0.77±0.01   |
|      | D <sub>2</sub> O    | 5.41±0.15                    | 1.20±0.02   | -3.08±0.29                   | 0.28±0.03  |                              |            | -15.17±0.06                         | -0.819±0.004 |
|      | 0.5H <sub>2</sub> O | 5.47±0.41                    | 1.20±0.05   | -2.91±0.72                   | 0.32±0.07  |                              |            | -16.81±0.18                         | -0.87±0.01   |
|      | Dry                 | 5.12±0.05                    | 1.157±0.006 |                              |            |                              |            |                                     |              |
| T101 | H <sub>2</sub> O    | 8.78±3.59                    | 1.59±0.47   | 0.40±0.45                    | 0.49±0.05  | -5.72±0.40                   | -0.08±0.03 | -14.62±0.14                         | -0.71±0.07   |
|      | D <sub>2</sub> O    | 5.45±0.63                    | 1.14±0.09   | -0.32±0.33                   | 0.42±0.03  | -6.50±0.46                   | -0.12±0.03 | -15.65±0.12                         | -0.77±0.05   |
|      | 0.5H <sub>2</sub> O | 5.59±1.95                    | 1.17±0.28   | 0.70±0.96                    | 0.54±0.10  | -5.50±0.62                   | -0.03±0.05 | -15.40±0.43                         | -0.72±0.03   |
|      | Dry                 | 3.58±0.05                    | 0.869±0.005 |                              |            |                              |            |                                     |              |

## References

1. H. Lin, J. Long, Q. Gu, W. Zhang, R. Ruan, Z. Li and X. Wang, *Phys Chem Chem Phys*, 2012, **14**, 9468-9474.
2. S. Ø. Stub, E. Vøllestad and T. Norby, *Journal of Materials Chemistry A*, 2018, **6**, 8265-8270.
